# Supplementary material
Source: PubMed Central journal article supplement (PMC5527386)
Supplement: JB.00197-17_zjb999094490s1.pdf [file JB.00197-17_zjb999094490s1.pdf]

1 Supplemental material

2

3 Subunit  $\alpha$

*MCR111\_M\_thermolithotrophicus*  $\alpha 1$  TT  $\eta 1$   $\alpha 2$   $\alpha 3$  TT  $\beta 1$  TT  $\beta 2$   
1 10 20 30 40 50 60 70 80  
MCR111\_M\_thermolithotrophicus ME AEK KLF PKALKEKFP ..... EDPKRYRKFVTTGGWQGSARKREVEANEKTVAEKRGTFYVNDP...GVP L GQR K L M P V K L S G T D Y I V R  
MCR111\_M\_formicicus MG AEK KLF PKALKEKFP ..... EDPKRYRKFVTTGGWQGSARKREVEANEKTVAEKRGTFYVNDP...GVP L GQR K L M P V K L S G T D Y I V R  
MCR111\_M\_maripaludis MD AEK KLF PKALKEKFP ..... EDPKRYRKFVTTGGWQGSARKREVEANEKTVAEKRGTFYVNDP...GVP L GQR K L M P V K L S G T D Y I V R  
MCR111\_M\_thermolithotrophicus ME AEK KLF PKALKEKFP ..... EDPKRYRKFVTTGGWQGSARKREVEANEKTVAEKRGTFYVNDP...GVP L GQR K L M P V K L S G T D Y I V R  
MCR111\_M\_formicicus MD NEK KLF PKALKEKFP ..... EDPKRYRKFVTTGGWQGSARKREVEANEKTVAEKRGTFYVNDP...GVP L GQR K L M P V K L S G T D Y I V R  
MCR111\_M\_wolfiellii MD NEK KLF PKALKEKFP ..... EDPKRYRKFVTTGGWQGSARKREVEANEKTVAEKRGTFYVNDP...GVP L GQR K L M P V K L S G T D Y I V R  
MCR111\_M\_marburgensis MA ...D KLF PKALKEKFP ..... EDPKRYRKFVTTGGWQGSARKREVEANEKTVAEKRGTFYVNDP...GVP L GQR K L M P V K L S G T D Y I V R  
MCR111\_M\_marburgensis SS SAE KLF PKALKEKFP ..... EDPKRYRKFVTTGGWQGSARKREVEANEKTVAEKRGTFYVNDP...GVP L GQR K L M P V K L S G T D Y I V R  
MCR111\_M\_kandleri MA ...D KLF PKALKEKFP ..... EDPKRYRKFVTTGGWQGSARKREVEANEKTVAEKRGTFYVNDP...GVP L GQR K L M P V K L S G T D Y I V R  
MCR111\_M\_barkeri MA ...D KLF PKALKEKFP ..... EDPKRYRKFVTTGGWQGSARKREVEANEKTVAEKRGTFYVNDP...GVP L GQR K L M P V K L S G T D Y I V R

*MCR111\_M\_thermolithotrophicus*  $\eta 2$   $\eta 3$   $\alpha 4$   $\beta 3$   $\alpha 5$   $\alpha 6$   $\eta 4$   $\beta 4$   $\alpha 7$   
90 100 110 120 130 140 150 160 170 180  
MCR111\_M\_thermolithotrophicus GDDLHFNNAAGQVDDIRRTVIGMDTGHAVVEKRLGVEVTPETINNYMETNHALPGGAVVOEHMVEHPFLAVDGVAKIFITGDELDADEDRKFLI  
MCR111\_M\_formicicus GDDLHFNNAAGQVDDIRRTVIGMDTGHAVVEKRLGVEVTPETINNYMETNHALPGGAVVOEHMVEHPFLAVDGVAKIFITGDELDADEDRKFLI  
MCR111\_M\_maripaludis GDDLHFNNAAGQVDDIRRTVIGMDTGHAVVEKRLGVEVTPETINNYMETNHALPGGAVVOEHMVEHPFLAVDGVAKIFITGDELDADEDRKFLI  
MCR111\_M\_thermolithotrophicus GDDLHFNNAAGQVDDIRRTVIGMDTGHAVVEKRLGVEVTPETINNYMETNHALPGGAVVOEHMVEHPFLAVDGVAKIFITGDELDADEDRKFLI  
MCR111\_M\_formicicus GDDLHFNNAAGQVDDIRRTVIGMDTGHAVVEKRLGVEVTPETINNYMETNHALPGGAVVOEHMVEHPFLAVDGVAKIFITGDELDADEDRKFLI  
MCR111\_M\_wolfiellii GDDLHFNNAAGQVDDIRRTVIGMDTGHAVVEKRLGVEVTPETINNYMETNHALPGGAVVOEHMVEHPFLAVDGVAKIFITGDELDADEDRKFLI  
MCR111\_M\_marburgensis GDDLHFNNAAGQVDDIRRTVIGMDTGHAVVEKRLGVEVTPETINNYMETNHALPGGAVVOEHMVEHPFLAVDGVAKIFITGDELDADEDRKFLI  
MCR111\_M\_kandleri GDDLHFNNAAGQVDDIRRTVIGMDTGHAVVEKRLGVEVTPETINNYMETNHALPGGAVVOEHMVEHPFLAVDGVAKIFITGDELDADEDRKFLI  
MCR111\_M\_barkeri GDDLHFNNAAGQVDDIRRTVIGMDTGHAVVEKRLGVEVTPETINNYMETNHALPGGAVVOEHMVEHPFLAVDGVAKIFITGDELDADEDRKFLI

*MCR111\_M\_thermolithotrophicus*  $\alpha 8$   $\alpha 9$   $\beta 5$   $\alpha 10$   $\alpha 11$   $\alpha 12$   $\beta 6$   $\eta 5$   $\eta 6$   
190 200 210 220 230 240 250 260 270 280  
MCR111\_M\_thermolithotrophicus DIKRFEBQAEOLKAAIGKRTYQSRVPLVGRVCGGTVSRWSAMQIMSEITAVKLCAGEAATADFSVAASKHADVIVQGNALPARRARGNPEPGGTR  
MCR111\_M\_formicicus DIKRFEBQAEOLKAAIGKRTYQSRVPLVGRVCGGTVSRWSAMQIMSEITAVKLCAGEAATADFSVAASKHADVIVQGNALPARRARGNPEPGGTR  
MCR111\_M\_maripaludis DIKRFEBQAEOLKAAIGKRTYQSRVPLVGRVCGGTVSRWSAMQIMSEITAVKLCAGEAATADFSVAASKHADVIVQGNALPARRARGNPEPGGTR  
MCR111\_M\_thermolithotrophicus DIKRFEBQAEMLKRYICNRTYQSRVPLVGRVCGGTVSRWSAMQIMSEITAVKLCAGEAATADFSVAASKHADVIVQGNALPARRARGNPEPGGTR  
MCR111\_M\_formicicus DIKRFEBQAEMLKRYICNRTYQSRVPLVGRVCGGTVSRWSAMQIMSEITAVKLCAGEAATADFSVAASKHADVIVQGNALPARRARGNPEPGGTR  
MCR111\_M\_wolfiellii DIKRFEBQAEMLKRYICNRTYQSRVPLVGRVCGGTVSRWSAMQIMSEITAVKLCAGEAATADFSVAASKHADVIVQGNALPARRARGNPEPGGTR  
MCR111\_M\_marburgensis DIKRFEBQAEMLKRYICNRTYQSRVPLVGRVCGGTVSRWSAMQIMSEITAVKLCAGEAATADFSVAASKHADVIVQGNALPARRARGNPEPGGTR  
MCR111\_M\_kandleri DIKRFEBQAEMLKRYICNRTYQSRVPLVGRVCGGTVSRWSAMQIMSEITAVKLCAGEAATADFSVAASKHADVIVQGNALPARRARGNPEPGGTR  
MCR111\_M\_barkeri DIKRFEBQAEMLKRYICNRTYQSRVPLVGRVCGGTVSRWSAMQIMSEITAVKLCAGEAATADFSVAASKHADVIVQGNALPARRARGNPEPGGTR

*MCR111\_M\_thermolithotrophicus*  $\alpha 13$   $\alpha 14$   $\alpha 15$   $\eta 1$   $\alpha 16$   $\alpha 17$   
290 300 310 320 330 340 350 360 370  
MCR111\_M\_thermolithotrophicus FVGLDQIVQTRV...SDPPVEQLSLEVVAVGAMIIYDGLWLGYSMSGGVGFQYAAAYVDDILDDFFAVYGVVYVKKYGINNS...TKP FMDVVDDIAT  
MCR111\_M\_formicicus FVGLDQIVQTRV...SDPPVEQLSLEVVAVGAMIIYDGLWLGYSMSGGVGFQYAAAYVDDILDDFFAVYGVVYVKKYGINNS...TKP FMDVVDDIAT  
MCR111\_M\_maripaludis FVGLDQIVQTRV...SDPPVEQLSLEVVAVGAMIIYDGLWLGYSMSGGVGFQYAAAYVDDILDDFFAVYGVVYVKKYGINNS...TKP FMDVVDDIAT  
MCR111\_M\_thermolithotrophicus FVGLDQIVQTRV...SDPPVEQLSLEVVAVGAMIIYDGLWLGYSMSGGVGFQYAAAYVDDILDDFFAVYGVVYVKKYGINNS...TKP FMDVVDDIAT  
MCR111\_M\_formicicus FVGLDQIVQTRV...SDPPVEQLSLEVVAVGAMIIYDGLWLGYSMSGGVGFQYAAAYVDDILDDFFAVYGVVYVKKYGINNS...TKP FMDVVDDIAT  
MCR111\_M\_wolfiellii FVGLDQIVQTRV...SDPPVEQLSLEVVAVGAMIIYDGLWLGYSMSGGVGFQYAAAYVDDILDDFFAVYGVVYVKKYGINNS...TKP FMDVVDDIAT  
MCR111\_M\_marburgensis FVGLDQIVQTRV...SDPPVEQLSLEVVAVGAMIIYDGLWLGYSMSGGVGFQYAAAYVDDILDDFFAVYGVVYVKKYGINNS...TKP FMDVVDDIAT  
MCR111\_M\_kandleri FVGLDQIVQTRV...SDPPVEQLSLEVVAVGAMIIYDGLWLGYSMSGGVGFQYAAAYVDDILDDFFAVYGVVYVKKYGINNS...TKP FMDVVDDIAT  
MCR111\_M\_barkeri FVGLDQIVQTRV...SDPPVEQLSLEVVAVGAMIIYDGLWLGYSMSGGVGFQYAAAYVDDILDDFFAVYGVVYVKKYGINNS...TKP FMDVVDDIAT

*MCR111\_M\_thermolithotrophicus*  $\alpha 18$   $\alpha 19$   $\alpha 20$   $\alpha 21$   $\alpha 22$   $\alpha 23$   $\eta 7$   
380 390 400 410 420 430 440 450 460 470  
MCR111\_M\_thermolithotrophicus EVTFTSHQVDEYPLIDDFFGGSRRAVVAASACCTAFATGNSNAAGVNGWYLSQIIHKVEHSRLGFGYDLDQCCGASNSLSIRNDEGLIHEARGPNY  
MCR111\_M\_formicicus EVTFTSHQVDEYPLIDDFFGGSRRAVVAASACCTAFATGNSNAAGVNGWYLSQIIHKVEHSRLGFGYDLDQCCGASNSLSIRNDEGLIHEARGPNY  
MCR111\_M\_maripaludis EVTFTSHQVDEYPLIDDFFGGSRRAVVAASACCTAFATGNSNAAGVNGWYLSQIIHKVEHSRLGFGYDLDQCCGASNSLSIRNDEGLIHEARGPNY  
MCR111\_M\_thermolithotrophicus EVTFTSHQVDEYPLIDDFFGGSRRAVVAASACCTAFATGNSNAAGVNGWYLSQIIHKVEHSRLGFGYDLDQCCGASNSLSIRNDEGLIHEARGPNY  
MCR111\_M\_formicicus EVTFTSHQVDEYPLIDDFFGGSRRAVVAASACCTAFATGNSNAAGVNGWYLSQIIHKVEHSRLGFGYDLDQCCGASNSLSIRNDEGLIHEARGPNY  
MCR111\_M\_wolfiellii EVTFTSHQVDEYPLIDDFFGGSRRAVVAASACCTAFATGNSNAAGVNGWYLSQIIHKVEHSRLGFGYDLDQCCGASNSLSIRNDEGLIHEARGPNY  
MCR111\_M\_marburgensis EVTFTSHQVDEYPLIDDFFGGSRRAVVAASACCTAFATGNSNAAGVNGWYLSQIIHKVEHSRLGFGYDLDQCCGASNSLSIRNDEGLIHEARGPNY  
MCR111\_M\_kandleri EVTFTSHQVDEYPLIDDFFGGSRRAVVAASACCTAFATGNSNAAGVNGWYLSQIIHKVEHSRLGFGYDLDQCCGASNSLSIRNDEGLIHEARGPNY  
MCR111\_M\_barkeri EVTFTSHQVDEYPLIDDFFGGSRRAVVAASACCTAFATGNSNAAGVNGWYLSQIIHKVEHSRLGFGYDLDQCCGASNSLSIRNDEGLIHEARGPNY

*MCR111\_M\_thermolithotrophicus*  $\eta 8$   $\alpha 24$   $\alpha 25$  TT  $\alpha 26$   $\eta 9$   
480 490 500 510 520 530 540 550  
MCR111\_M\_thermolithotrophicus PNYAMNVGHGQVACIQAHAARADAFVNPVRIAFADPDLVDFPDRFRRECRGAREFEPAAGRDVILP...R  
MCR111\_M\_formicicus PNYAMNVGHGQVACIQAHAARADAFVNPVRIAFADPDLVDFPDRFRRECRGAREFEPAAGRDVILP...R  
MCR111\_M\_maripaludis PNYAMNVGHGQVACIQAHAARADAFVNPVRIAFADPDLVDFPDRFRRECRGAREFEPAAGRDVILP...R  
MCR111\_M\_thermolithotrophicus PNYAMNVGHGQVACIQAHAARADAFVNPVRIAFADPDLVDFPDRFRRECRGAREFEPAAGRDVILP...R  
MCR111\_M\_formicicus PNYAMNVGHGQVACIQAHAARADAFVNPVRIAFADPDLVDFPDRFRRECRGAREFEPAAGRDVILP...R  
MCR111\_M\_wolfiellii PNYAMNVGHGQVACIQAHAARADAFVNPVRIAFADPDLVDFPDRFRRECRGAREFEPAAGRDVILP...R  
MCR111\_M\_marburgensis PNYAMNVGHGQVACIQAHAARADAFVNPVRIAFADPDLVDFPDRFRRECRGAREFEPAAGRDVILP...R  
MCR111\_M\_kandleri PNYAMNVGHGQVACIQAHAARADAFVNPVRIAFADPDLVDFPDRFRRECRGAREFEPAAGRDVILP...R  
MCR111\_M\_barkeri PNYAMNVGHGQVACIQAHAARADAFVNPVRIAFADPDLVDFPDRFRRECRGAREFEPAAGRDVILP...R

4

5

6 Subunit  $\beta$

7

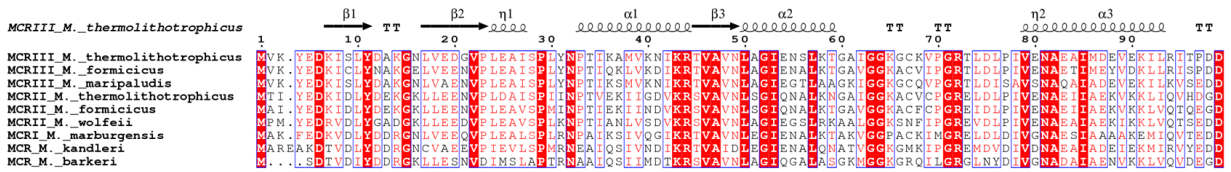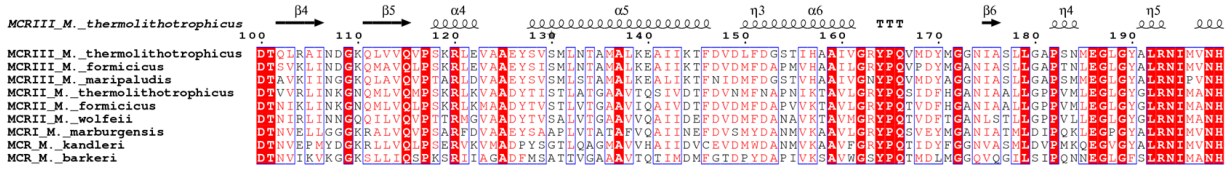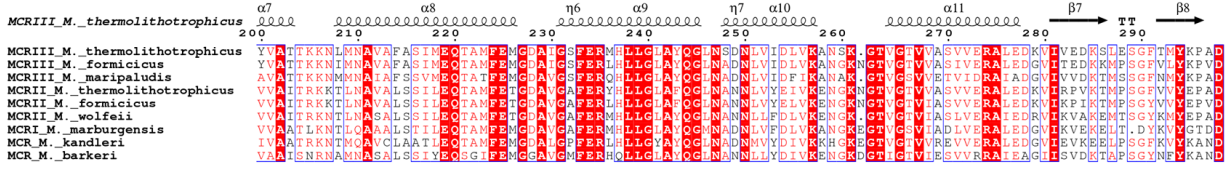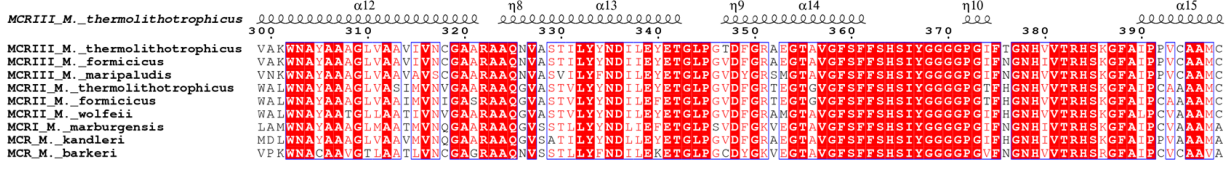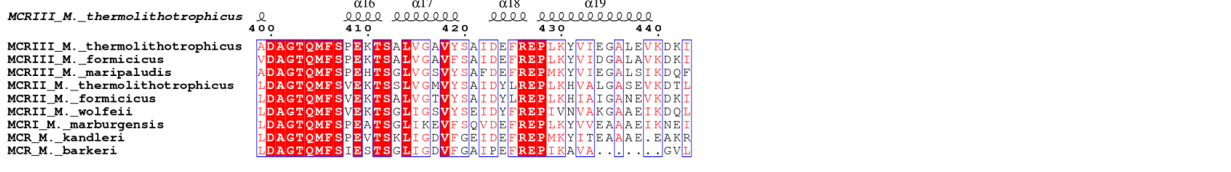

8

9

10 Subunit  $\gamma$

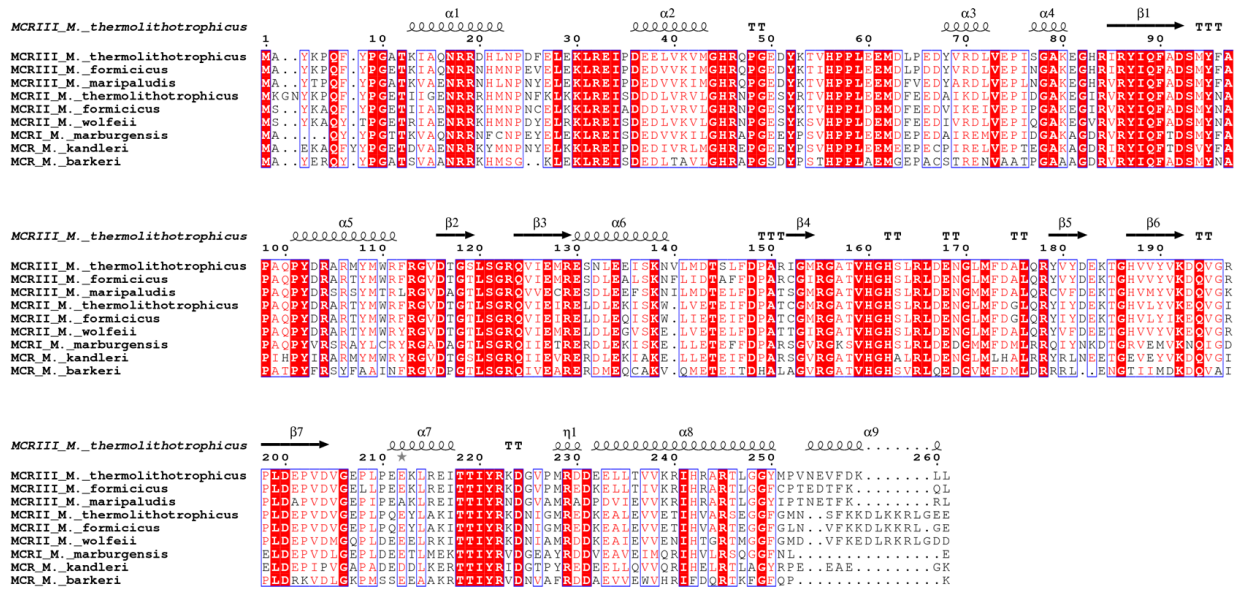

11

12

13 **Fig. S1.** Primary structure comparison of subunits  $\alpha$ ,  $\beta$  and  $\gamma$  of MCR.

14

15

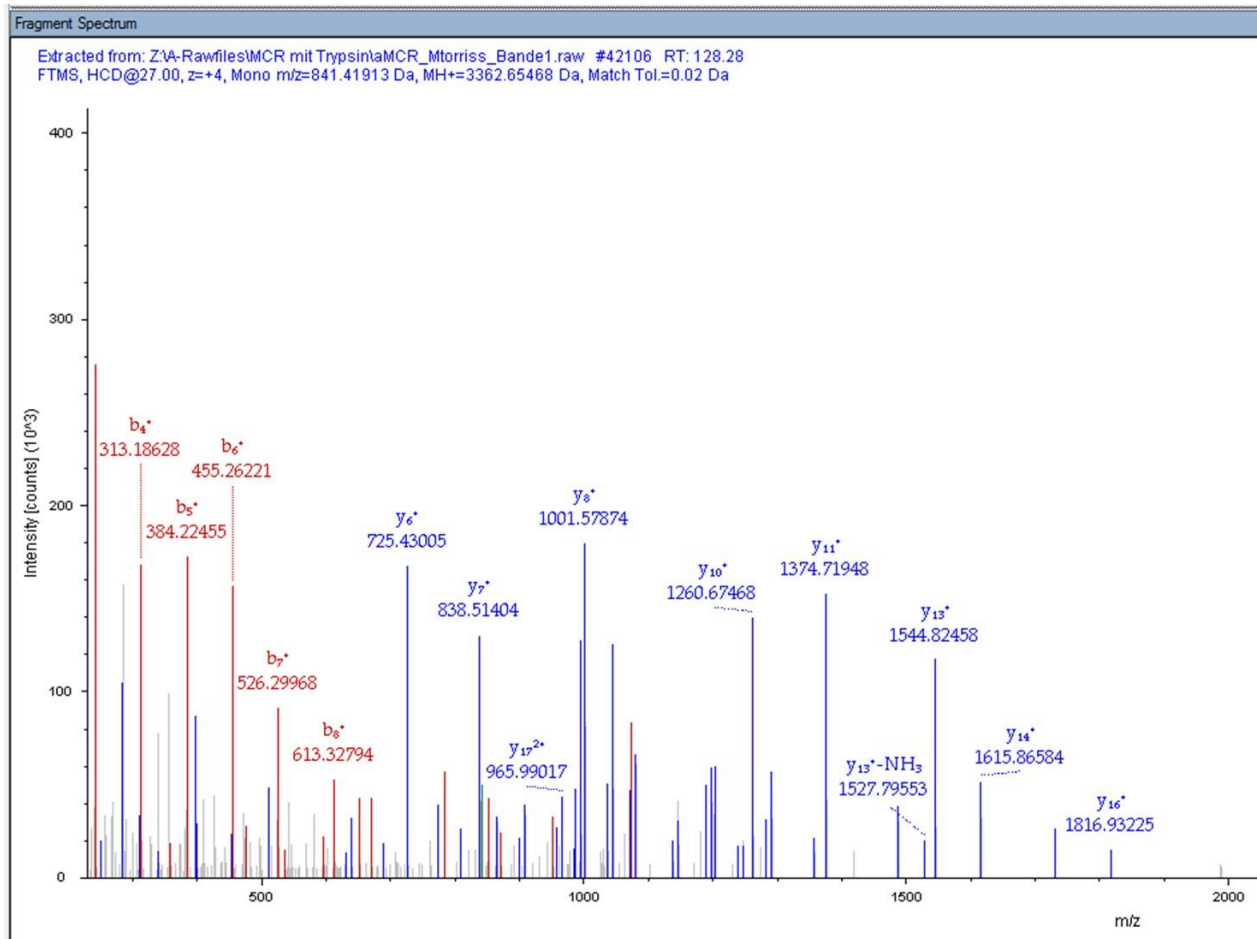

16

17 **Fig. S2.** A part of MALDI-TOF-MS (MS/MS) mass fragmentation spectrum of a trypsin-digested  
18 peptide, <sup>403</sup>AAVAAAASGISVCMATGNSNAGLNGWYLSQILHK<sup>437</sup> from the  $\alpha$ -subunit of  
19 MCR from *M. formicicus*. The amino acid sequence of the relevant peaks are given in Table 3.

20

21 **Table S1.** Substrates and habitats of methanogenic archaea. If not indicated otherwise  
 22 information was retrieved from Bergeys Manual of Systematics of Archaea and Bacteria (18, 65-  
 23 69)

| Group / Genera                  | Substrate range                                                                             | Habitat / Isolated from                                                 | Environment / Temperature (pH) preference |
|---------------------------------|---------------------------------------------------------------------------------------------|-------------------------------------------------------------------------|-------------------------------------------|
| <b>Methanobacteriales</b>       |                                                                                             |                                                                         |                                           |
| <i>Methanobacterium</i> spp.    | hydrogenotrophic, varying co-substrates with CO <sub>2</sub> , formatotrophic               | sewage sludge, anaerobic digestors, oil-bearing rock cores, rice fields | aquatic / soil, mesophilic                |
| <i>Methanothermobacter</i> spp. | hydrogenotrophic, formatotrophic                                                            | sewage sludge, river sediments                                          | aquatic, mesophilic                       |
| <i>Methanothermus</i> spp.      | hydrogenotrophic                                                                            | sulfurous mud springs                                                   | aquatic, thermophilic                     |
| <i>Methanosphaera</i> spp.      | hydrogenotrophic, alcoholotrophic (methanol)                                                | human large intestine, feces                                            | intestinal tracts, mesophilic             |
| <i>Methanobrevibacter</i> spp.  | hydrogenotrophic, formatotrophic                                                            | rumen, anaerobic digestors, termite gut, gingiva, feces                 | intestinal tracts, mesophilic             |
| <b>Methanopyrales</b>           |                                                                                             |                                                                         |                                           |
| <i>Methanopyrus kandleri</i>    | hydrogenotrophic                                                                            | hydrothermal vents                                                      | aquatic, hyperthermophilic                |
| <b>Methanococcales</b>          |                                                                                             |                                                                         |                                           |
| <i>Methanocaldococcus</i> spp.  | hydrogenotrophic                                                                            | hydrothermal vents                                                      | aquatic, thermophilic                     |
| <i>Methanotorris</i> spp.       | hydrogenotrophic                                                                            | hydrothermal vents                                                      | aquatic, thermophilic                     |
| <i>Methanococcus</i> spp.       | hydrogenotrophic, formatotrophic, methylamines, alcoholotrophic (methanol), methyl sulfides | marine environments (primarily sediments)                               | aquatic, mesophilic                       |
| <i>Methanothermococcus</i> spp. | hydrogenotrophic, formatotrophic                                                            | geothermally heated marine sediments                                    | aquatic, thermophilic                     |
| <b>Methanocellales</b>          |                                                                                             |                                                                         |                                           |

|                                |                                                                                 |                                                                           |                                           |
|--------------------------------|---------------------------------------------------------------------------------|---------------------------------------------------------------------------|-------------------------------------------|
| <i>Methanocella</i> spp.       | hydrogenotrophic                                                                | soils, especially rice fields                                             | soil, mesophilic                          |
| <b>Methanomicrobiales</b>      |                                                                                 |                                                                           |                                           |
| <i>Methanocalculus</i> spp.    | hydrogenotrophic, formatotrophic                                                | alkaline lakes                                                            | aquatic, mesophilic (alkaliphilic)        |
| <i>Methanocorpusculum</i> spp. | hydrogenotrophic, formatotrophic                                                | anaerobic digestors, waste water, coal beds, shale                        | aquatic / soil, mesophilic                |
| <i>Methanoculleus</i> spp.     | hydrogenotrophic, formatotrophic                                                | marine sediments, biogas plants                                           | aquatic, mesophilic                       |
| <i>Methanofollis</i> spp.      | hydrogenotrophic, formatotrophic, alcoholotrophic (propanol, butanol, pentanol) | waste water reactors                                                      | aquatic, mesophilic                       |
| <i>Methanogenium</i> spp.      | hydrogenotrophic, formatotrophic                                                | freshwater sediments                                                      | aquatic, mesophilic                       |
| <i>Methanolacina</i> spp.      | ---                                                                             | marine sediments                                                          | aquatic, mesophilic                       |
| <i>Methanomicrobium</i> spp.   | hydrogenotrophic                                                                | marine sediments                                                          | aquatic, mesophilic                       |
| <i>Methanoplanus</i> spp.      | hydrogenotrophic, formatotrophic, alcoholotrophic (propanol)                    | marine sediments, oil fields                                              | aquatic, mesophilic                       |
| <i>Methanolinea</i> spp.       | hydrogenotrophic, formatotrophic                                                | sewage sludge, marine sediments, fen sediments                            | aquatic, mesophilic (acidophilic)         |
| <i>Methanoregula</i> spp.      | hydrogenotrophic                                                                | acidic bog                                                                | aquatic, mesophilic (acidophilic)         |
| <i>Methanosphaerula</i> spp.   | hydrogenotrophic, formatotrophic                                                | acidic peatlands                                                          | aquatic, mesophilic (acidophilic)         |
| <i>Methanospirillum</i> spp.   | hydrogenotrophic, formatotrophic, alcoholotrophic (propanol)                    | sewage sludge, digestors                                                  | aquatic, mesophilic                       |
| <b>Methanosarcinales</b>       |                                                                                 |                                                                           |                                           |
| <i>Methanosaeta</i> spp.       | acetoclastic                                                                    | anaerobic digestors, anoxic sediments / soils, hot springs, thermal lakes | aquatic / soil, mesophilic / thermophilic |

|                                  |                                                |                                              |                                                   |
|----------------------------------|------------------------------------------------|----------------------------------------------|---------------------------------------------------|
| <i>Methanimicrococcus</i> spp.   | methylotrophic                                 | cockroach gut                                | intestinal tracts, mesophilic                     |
| <i>Methanococcoides</i> spp.     | methylotrophic                                 | submarine canyon, Ace lake                   | aquatic, psychrophilic / mesophilic               |
| <i>Methanohalobium</i> spp.      | methylotrophic                                 | highly saline environments                   | aquatic / sediment, mesophilic / thermophilic     |
| <i>Methanohalophilus</i> spp.    | methylotrophic                                 | saline environments                          | aquatic / sediment, mesophilic                    |
| <i>Methanobolus</i> spp.         | methylotrophic                                 | mesophilic, anoxic environments (e.g. rocks) | terrestrial / aquatic, psychrophilic / mesophilic |
| <i>Methanomethylovorans</i> spp. | methylotrophic                                 | sludge reactors, lake sediments              | aquatic, mesophilic / thermophilic                |
| <i>Methanosalsum</i> spp.        | methylotrophic                                 | hypersaline soda lakes                       | aquatic, mesophilic / moderately thermophilic     |
| <i>Methanosarcina</i> spp.       | hydrogenotrophic, acetoclastic, methylotrophic | almost ubiquitous in anoxic environments     | ubiquitous, mesophilic / moderately thermophilic  |
| <i>Methermicrococcus</i> spp.    | methylotrophic                                 | oil field                                    | aquatic, thermophilic                             |
| <b>Methanomassilicoccales</b>    |                                                |                                              |                                                   |
| <i>Methanomassilicoccus</i> spp. | methylotrophic                                 | intestinal tracts                            | intestinal tracts / mesophilic                    |
| <b>Bathyarchaeota</b>            |                                                |                                              |                                                   |
| Bathyarchaeota                   | methylotrophic                                 | ubiquitous, fresh water, open ocean          | -                                                 |
